# Supplementary material
Source: MDPI journal article supplement (https://www.mdpi.com/2072-4292/14/10/2427)
Supplement: s1 [file s1]

Information Gain ( $IG$ ) is also referred to as mutual information, representing the expected reduction in  $H$  (where *entropy*,  $H$ , is the *measure of disorder*) produced by partitioning the dataset according to a given attribute. The  $IG$  for an outcome  $Y$  from an attribute  $X$  represents the expected decrease in entropy of  $Y$  conditioned on  $X$ . The more information the factor provides regarding the landslide distribution, the higher the  $IG$  value [1]. The specific formula is as follows:

$$IG(Y, X) = H(Y) - H(Y|X) \quad (S1)$$

where  $H(Y)$  represents the entropy of  $Y$ , and  $H(Y|X)$  represents the entropy of  $Y$  given  $X$ .

$H(Y)$  can be written as:

$$H(Y) = -\sum_{i \in 1}^k p_i \log_2 p_i \quad (S2)$$

where  $p_i$  represents the proportion of instances belonging to class  $i$  in the data.

$H(Y|X)$  can be written as:

$$H(Y|X) = \sum_{j \in X} p_j H(Y|X = j) \quad (S3)$$

where  $p_j$  represents the probability that attribute  $X$  takes on value  $j$  in the data, thus:

$$H(Y|X = j) = \sum_{i \in 1}^k p_{(ij)} \log_2 p_{(ij)} \quad (S4)$$

We take the distance to fault of all landslides as an example to calculate the  $IG$ .

$$IG(\text{landslide}, \text{distance to fault}) = H(\text{landslides}) - H(\text{landslide}, \text{distance to fault})$$

|                   |       | Probability |                |                   |
|-------------------|-------|-------------|----------------|-------------------|
|                   |       | Total area  | Landslide area | Nonlandslide area |
| Distance to fault | 0-10  | 4           | 1              | 3                 |
|                   | 10-20 | 4           | 3              | 1                 |
|                   | 20-30 | 8           | 2              | 6                 |
|                   | >30   | 16          | 12             | 4                 |
| Total             |       | 32          |                |                   |

$$H(\text{landslides}) = -\left(\frac{18}{32} \log_2 \frac{18}{32}\right) - \left(\frac{14}{32} \log_2 \frac{14}{32}\right) = 0.99 \quad (S5)$$

$$H(\text{landslides}, \text{distance to fault})$$

$$= p(0-10) * H\left(\frac{1}{4}, \frac{3}{4}\right) + p(10-20) * H\left(\frac{3}{4}, \frac{1}{4}\right) + p(20-30) * H\left(\frac{2}{8}, \frac{6}{8}\right) + p(>30) * H\left(\frac{12}{16}, \frac{4}{16}\right)$$

$$= (\frac{4}{32}) * (-(\frac{1}{4} \log_2 \frac{1}{4}) - (\frac{3}{4} \log_2 \frac{3}{4})) + (\frac{4}{32}) * (-(\frac{3}{4} \log_2 \frac{3}{4}) - (\frac{1}{4} \log_2 \frac{1}{4})) + (\frac{8}{32}) * (-(\frac{2}{8} \log_2 \frac{2}{8}) - (\frac{6}{8} \log_2 \frac{6}{8})) +$$

$$(\frac{16}{32}) * (-(\frac{12}{16} \log_2 \frac{12}{16}) - (\frac{4}{16} \log_2 \frac{4}{16}))$$

$$= \frac{1}{8} * 0.81 + \frac{1}{8} * 0.81 + \frac{1}{4} * 0.81 + \frac{1}{2} * 0.81 = 0.81 \quad (S6)$$

$$IG(\text{landslide, distance to fault}) = H(\text{landslides}) - H(\text{landslide, distance to fault}) = 0.99 - 0.81 = 0.18 \quad (S7)$$

Therefore, the IG for the distance to fault as a predictor for landslide occurrence in the above example is 0.18.

## Reference

1. Fan, X.M.; Yunus, A.P.; Scaringi, G.; Catani, F.; Subramanian, S.S.; Xu, Q.; Huang, R.Q. Rapidly evolving controls of landslides after a strong earthquake and implications for hazard assessments. *Geophys. Res. Lett.* **2020**, doi:10.1029/2020GL090509.
